# Supplementary material for: Mandarin Essential Oils as an Alternative Method of Controlling the Fungus Alternaria alternata (Fr.: Fr.) Keissler
Source: MDPI journal article supplement (doi:10.3390/horticulturae9060613), 2023-05-23
Supplement: s1 [file s1]

Archive with 1 entries (1 files):
- horticulturae-2390682-supplementary.pdf
