# Supplementary material for: Mandarin Essential Oils as an Alternative Method of Controlling the Fungus Alternaria alternata (Fr.: Fr.) Keissler
Source: MDPI journal article supplement (doi:10.3390/horticulturae9060613), 2023-05-23
Supplement: s1 [file s1 › horticulturae-2390682-supplementary.pdf]

## SUPPLEMENTARY MATERIALS

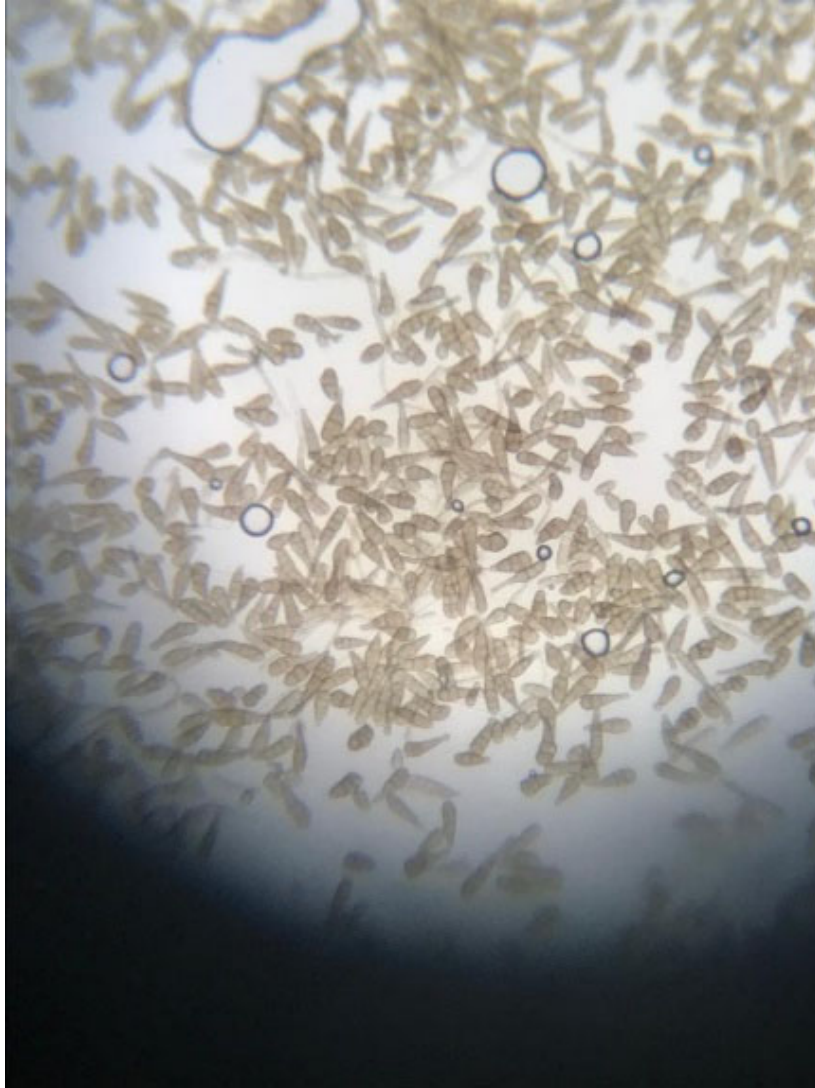

Figure S1: Conidia of *Alternaria alternata* observed in Leica DM750 light microscope (LM) (Leica Microsystems, Co., Wetzlar, Germany).

Table S1: *In vitro* mycelial growth of *Alternaria alternata*, in PDA culture media, added with different concentrations (1, 2, 4, 8 and 16  $\mu\text{L mL}^{-1}$ ) of essential oil from fruit peel (means of unripe and ripe) of mandarin fruits, grafted on Rangpur lime (Cordeirópolis, SP, 2019 and 2020). (\*) means followed by different lowercase letters, in the column, indicate significant differences between the doses within each variety and different uppercase letters, in the row, indicate significant differences between the varieties at the same dose (Tukey, 5%). n=12.

| Doses                             | Mycelial Growth (cm) |         |         |         |
|-----------------------------------|----------------------|---------|---------|---------|
|                                   | Fremont              | Murcott | Maria   | Late    |
| 0                                 | 7.96 aA              | 7.96 aA | 7.96 aA | 7.96 aA |
| 1                                 | 6.00 bA              | 6.06 bA | 6.03 bA | 6.05 bA |
| 2                                 | 5.94 bA              | 5.85 b  | 5.76 bA | 6.07 bA |
| 4                                 | 5.50 bA              | 5.55bA  | 4.56 bA | 5.23 bA |
| 8                                 | 5.11 bA              | 4.63 bA | 3.56 bA | 5.08 bA |
| 16                                | 4.87 bA              | 4.53 bA | 1.10 cB | 3.20 cA |
| Coefficient of Variation = 27.63% |                      |         |         |         |
| Standard Error (column) = 0.2058  |                      |         |         |         |
| Standard Error (row) = 0.3103     |                      |         |         |         |

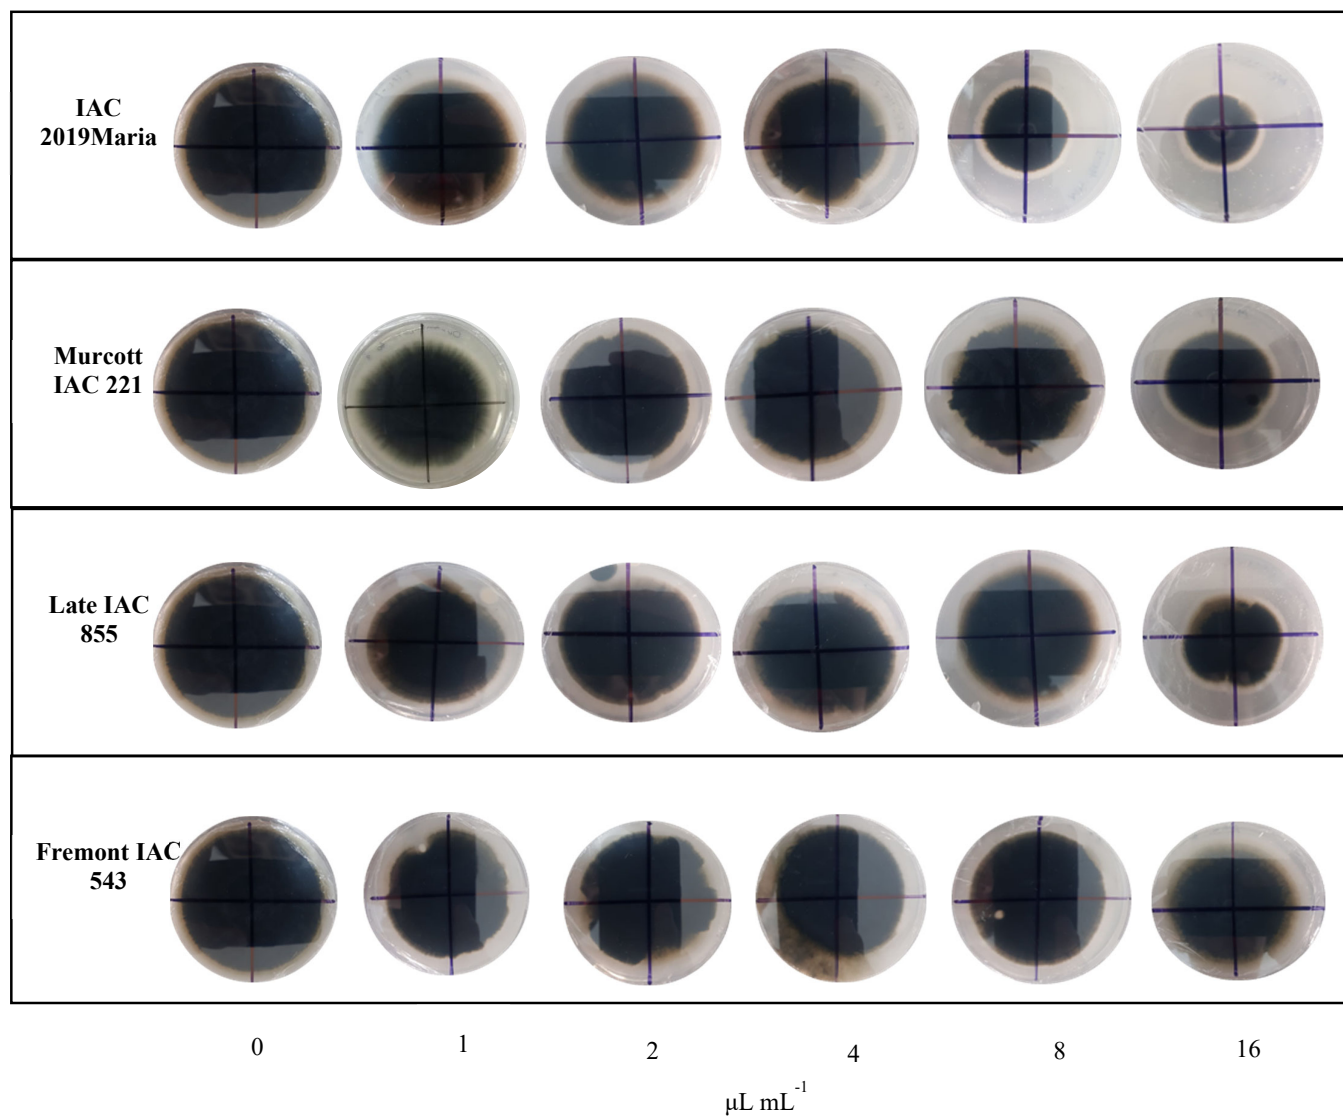

Figure S2: In vitro mycelial growth of the fungus *Alternaria alternata* after 168 h in culture medium BDA with different concentrations (1, 2, 4, 8 and 16  $\mu\text{L mL}^{-1}$ ) of mandarin essential oils.

Table S2: Severity (%) in preventive treatment, *in vitro*, of *Alternaria alternata*, on detached leaf with different concentrations of essential oil (2, 4, 8 and 16  $\mu\text{L mL}^{-1}$ ) means of unripe and ripe fruits of mandarins, grafted on Rangpur lime. (\*) means followed by different lowercase letters, in the column, indicate significant differences between the doses within each variety and different uppercase letters, in the row, indicate significant differences between the varieties at the same dose (Tukey, 5%). n=12.

| Doses                             | Preventive |        |         |        |
|-----------------------------------|------------|--------|---------|--------|
|                                   | Fremont    | Maria  | Murcott | Late   |
| 0                                 | 57.5aA*    | 57.5aA | 57.5aA  | 57.5aA |
| 2                                 | 3.0 bA     | 3.5 bA | 2.7 bA  | 2.2 bA |
| 4                                 | 2.5 bA     | 2.4 bA | 2.3 bA  | 1.9 bA |
| 8                                 | 1.5 bA     | 1.3 bA | 1.6 bA  | 1.4 bA |
| 16                                | 0.4 cA     | 0.1 cB | 0.4 cA  | 0.3 cA |
| Coefficient of Variation = 34.05% |            |        |         |        |
| Standard Error (column) = 0.1952  |            |        |         |        |
| Standard Error (row) = 0.0868     |            |        |         |        |

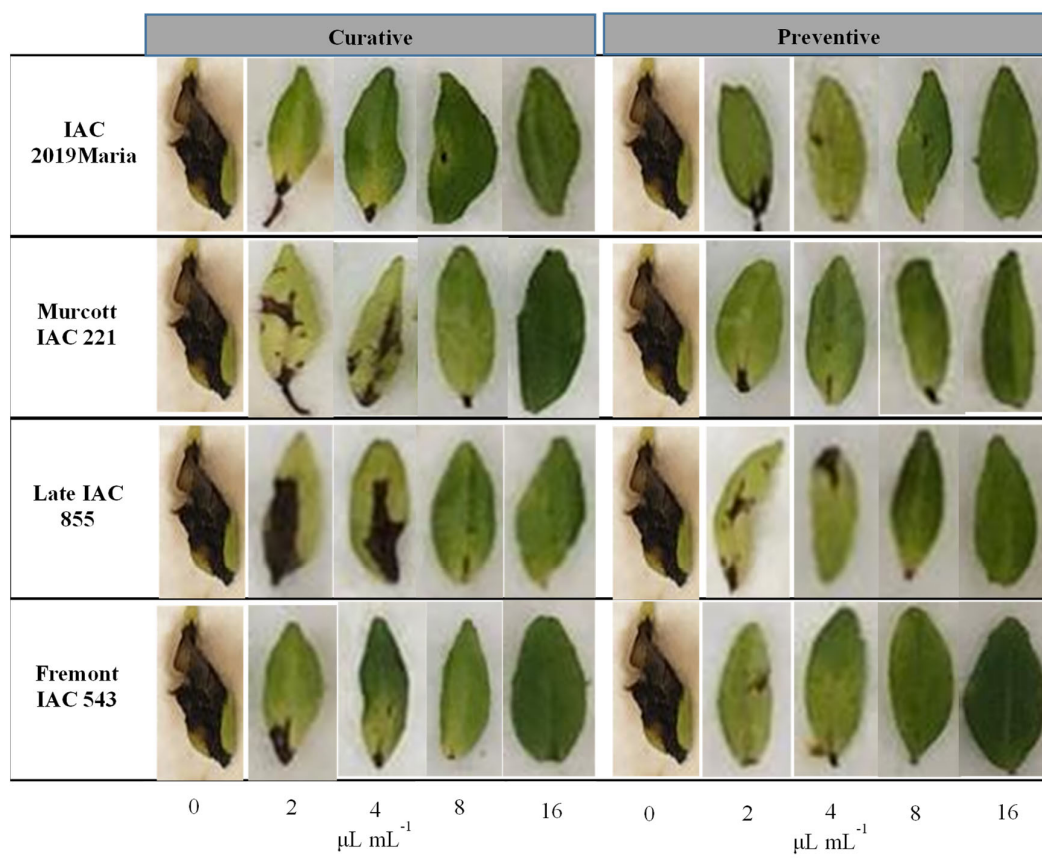

Figure S3: Alternaria brown spot symptoms on detached leaves after 168h, where 0 = control and different concentrations 2, 4, 8 and 16  $\mu\text{L mL}^{-1}$  of mandarin essential oils, in curative and preventive control.

Table S3: Severity (%) in the curative treatment, *in vitro*, of *Alternaria alternata*, in leaf detached with different concentrations of essential oil (2, 4, 8 and 16  $\mu\text{L mL}^{-1}$ ) means of unripe and ripe fruits of mandarins, grafted on Rangpur lime. (\*) means followed by different lowercase letters, in the column, indicate significant differences between the doses within each variety and different uppercase letters, in the row, indicate significant differences between the varieties at the same dose (Tukey, 5%). n=12.

| Doses                             | Curative |        |         |         |
|-----------------------------------|----------|--------|---------|---------|
|                                   | Fremont  | Maria  | Murcott | Late    |
| 0                                 | 57.5aA*  | 57.5aA | 57.5aA  | 57.5aA  |
| 2                                 | 10.0 bA  | 5.8 bB | 7.5 bAB | 12.0 bA |
| 4                                 | 6.4 bA   | 3.7 bB | 3.8 bB  | 8.3 bA  |
| 8                                 | 4.2 bA   | 2.4 bB | 2.5 bcB | 3.5 bcA |
| 16                                | 1.8 cA   | 0.6 cB | 1.7 cA  | 1.5 cA  |
| Coefficient of Variation = 27.18% |          |        |         |         |
| Standard Error = 0.4407           |          |        |         |         |
| Standard Error = 0.0745           |          |        |         |         |
